# Supplementary figures and images for: Gastric Hyperplastic Polyp Causing Upper Gastrointestinal Hemorrhage and Severe Anemia in a Dog
Source: MDPI journal article supplement (doi:10.3390/vetsci9120680), 2022-12-07

# Negative result of Warthin-Starry silver staining

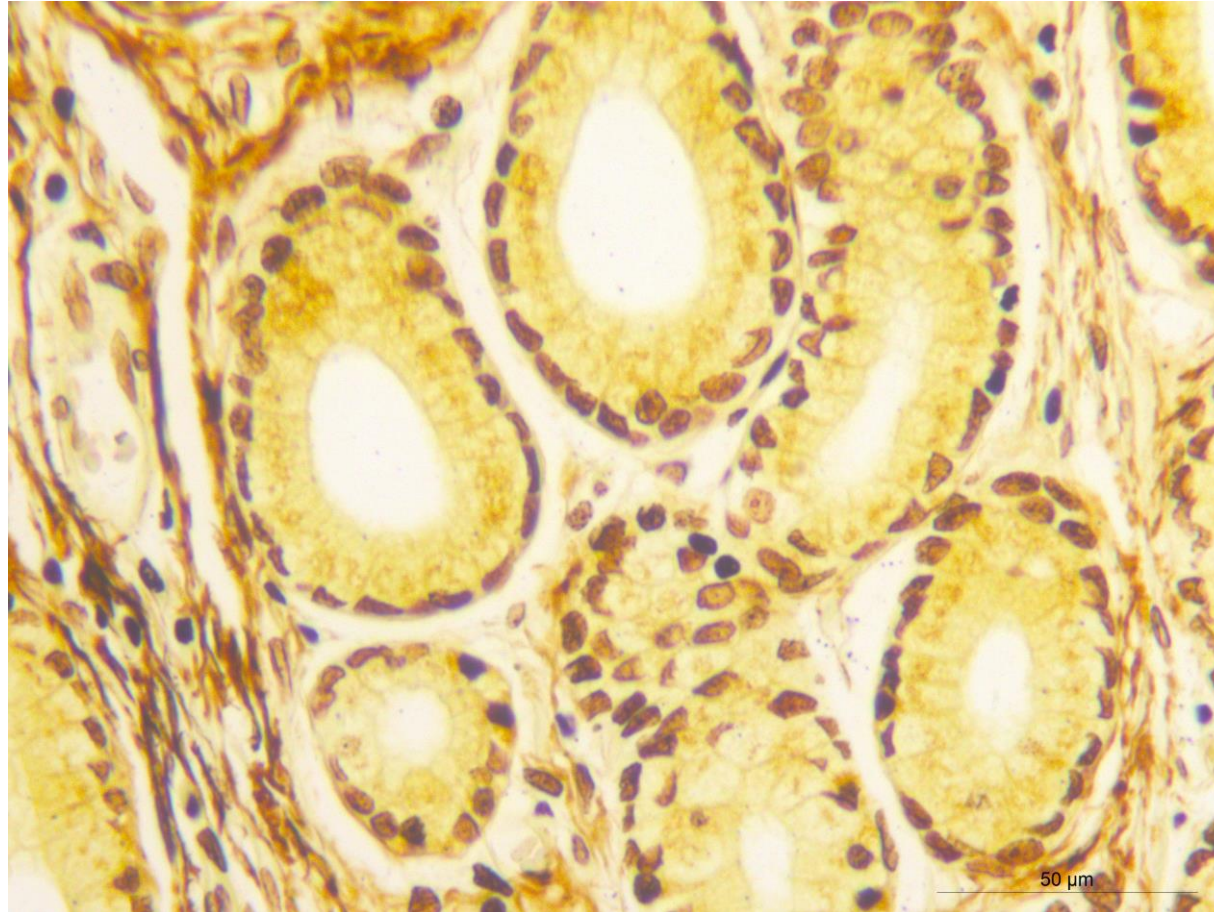

Supplement: s1 [file s1]
